# Supplementary material for: Sensitivity Studies of Four‐Dimensional Local Ensemble Transform Kalman Filter Coupled With WRF-Chem Version 3.9.1 for Improving Particulate Matter Simulation Accuracy
Source: Copernicus journal article supplement (doi:10.5194/egusphere-2024-3321), 2024-11-05
Supplement: Supplementary file 2 [file egusphere-2024-3321-supplement.pdf]

Supplement of

# Sensitivity Studies of Four-Dimensional Local Ensemble Transform Kalman Filter Coupled With WRF-Chem Version 3.9.1 for Improving Particulate Matter Simulation Accuracy

## Accuracy

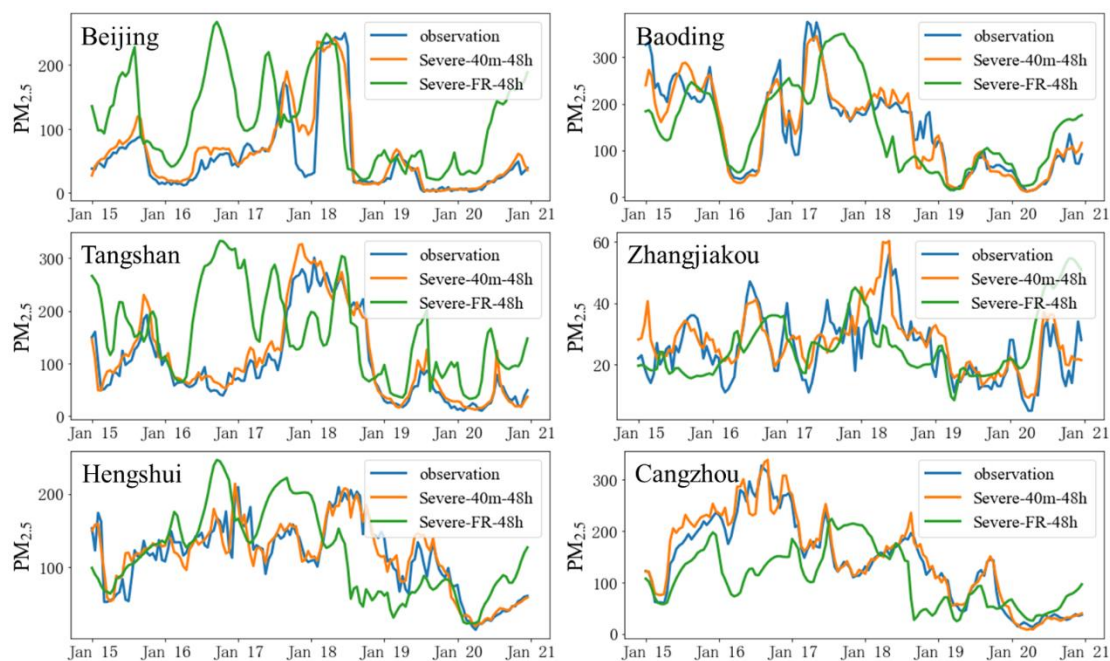

Figure S1. Temporal variations of PM<sub>2.5</sub> from Severe-40m-48h, Severe-FR-48h and

observation at six independent verification stations (units:  $\mu\text{g m}^{-3}$ ).

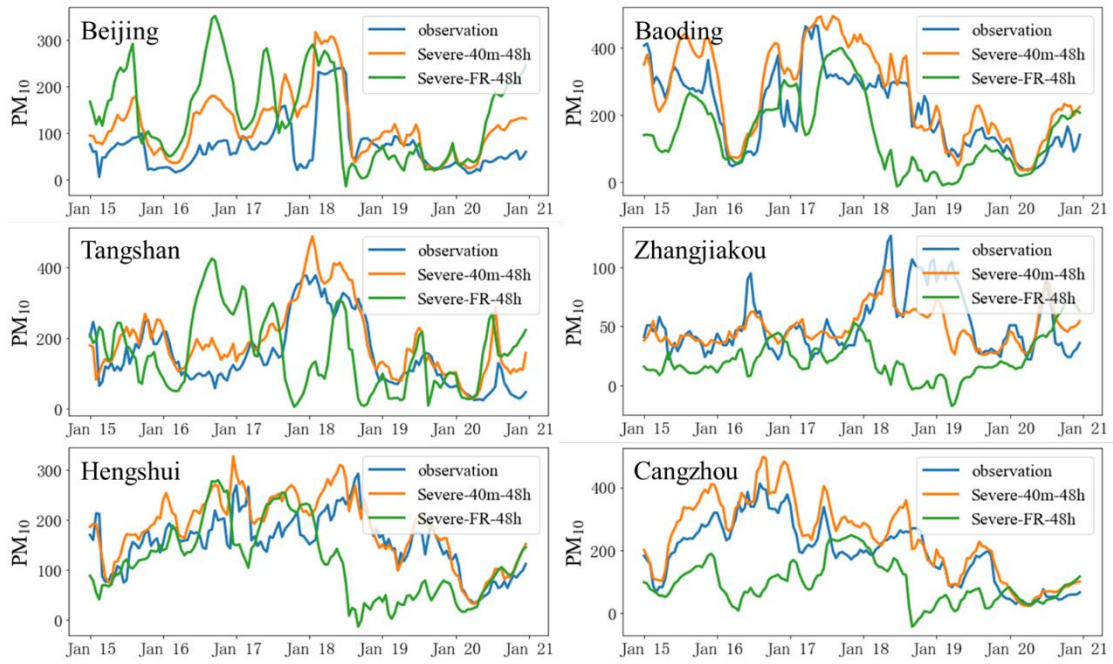

Figure S2. Similar with Figure S2 but for PM<sub>10</sub>.

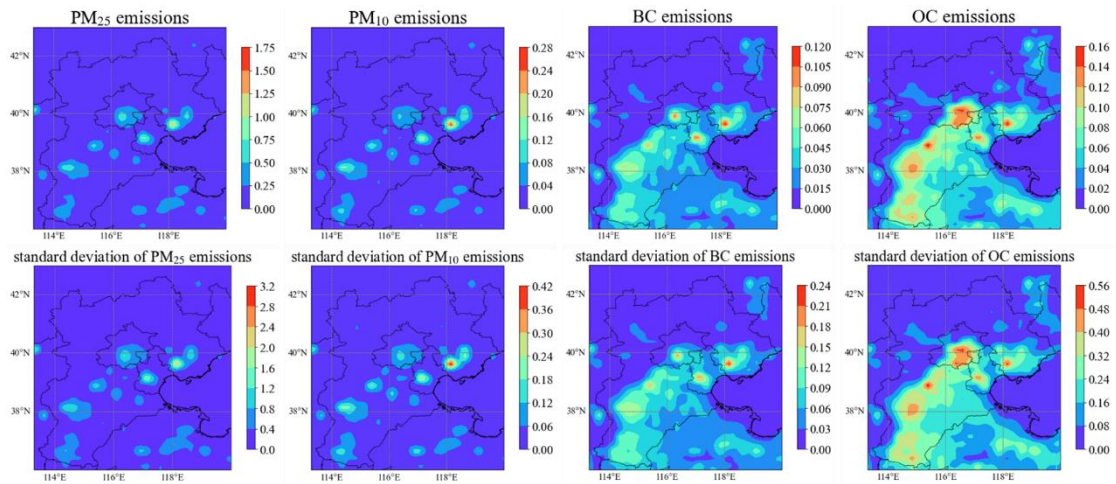

Figure S3. Contour maps about spatial distribution of anthropogenic PM<sub>2.5</sub>, PM<sub>10</sub>, BC and OC

emissions in first row (units:  $\mu\text{g m}^{-2} \text{s}^{-1}$ ) and their standard deviations calculated from 40

ensemble members in second row.

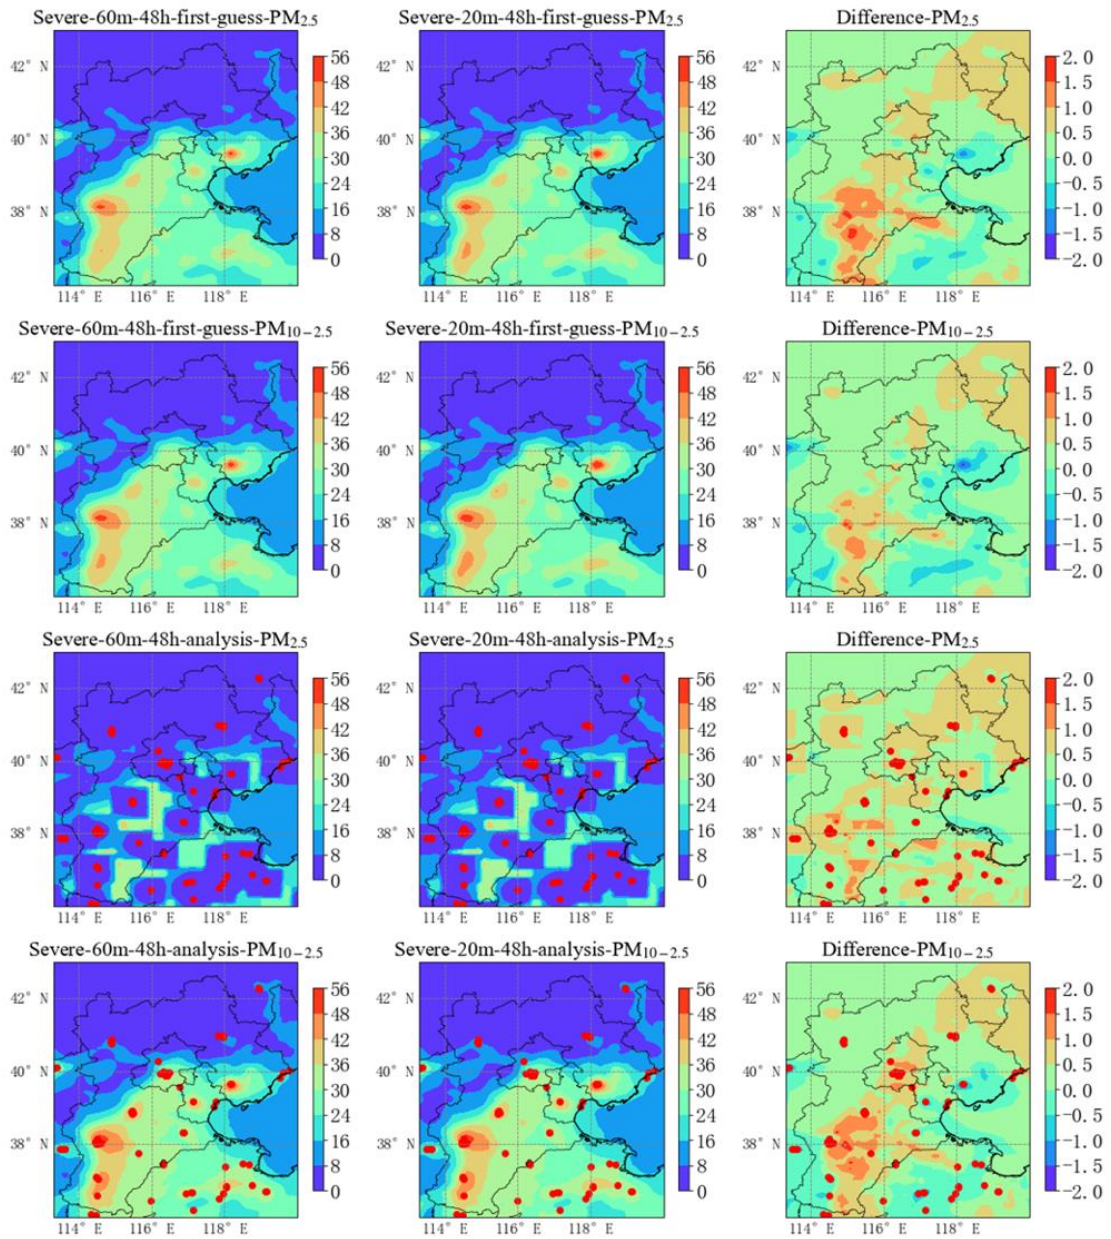

Figure S4. Contour maps of spatial distributions of temporal averaged  $PM_{2.5}$  and  $PM_{10-2.5}$  standard deviations in the first guess (first and second row) and analysis (third and fourth row) of (Severe-60m-48h minus Severe-20m-48h) within simulation period (units:  $\mu g m^{-3}$ ).

The red dots in analysis of  $PM_{2.5}$  and  $PM_{10-2.5}$  implies the location of assimilated stations.



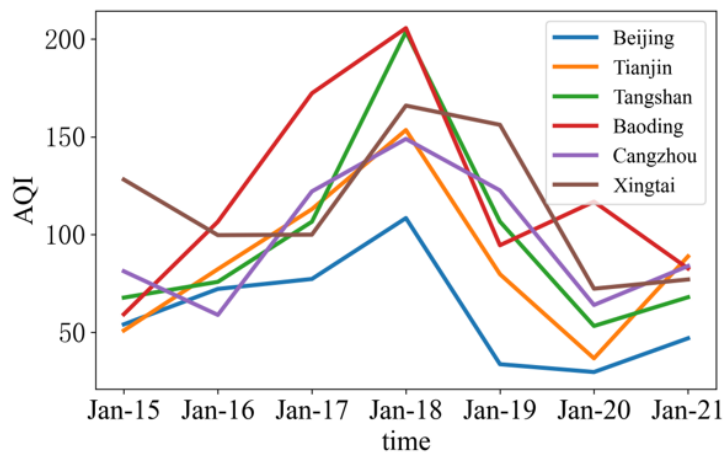

Figure S5. Temporal variation about air quality index at six representative sites in moderate haze event.

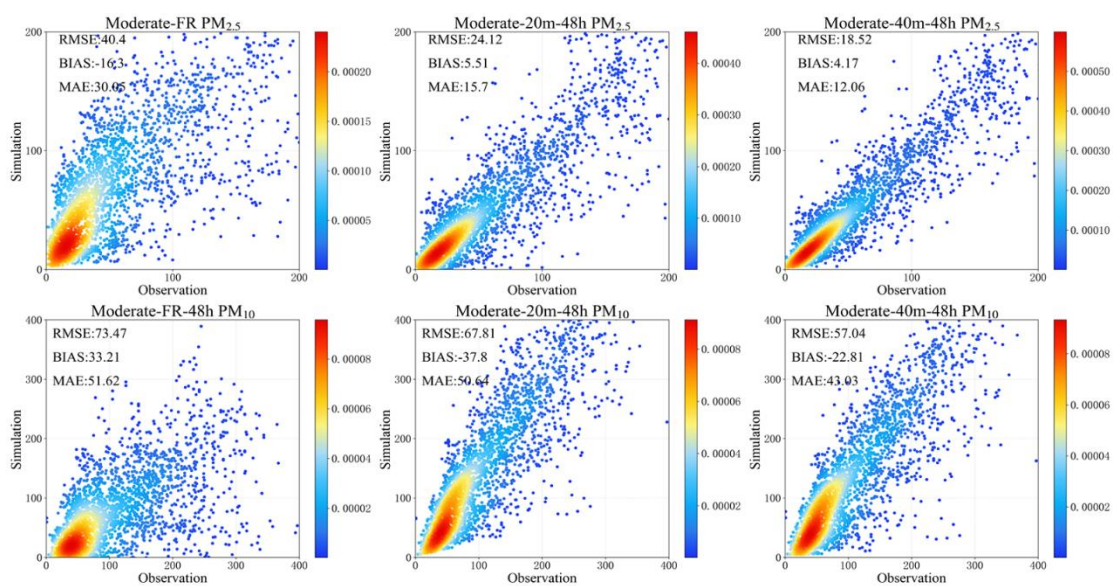

Figure S6. Scatter and density plots of PM<sub>2.5</sub> and PM<sub>10</sub> observations from verification stations versus those in Moderate-FR-48h, Moderate-20m-48h and Moderate-40m-48h (units:  $\mu\text{g m}^{-3}$ ).

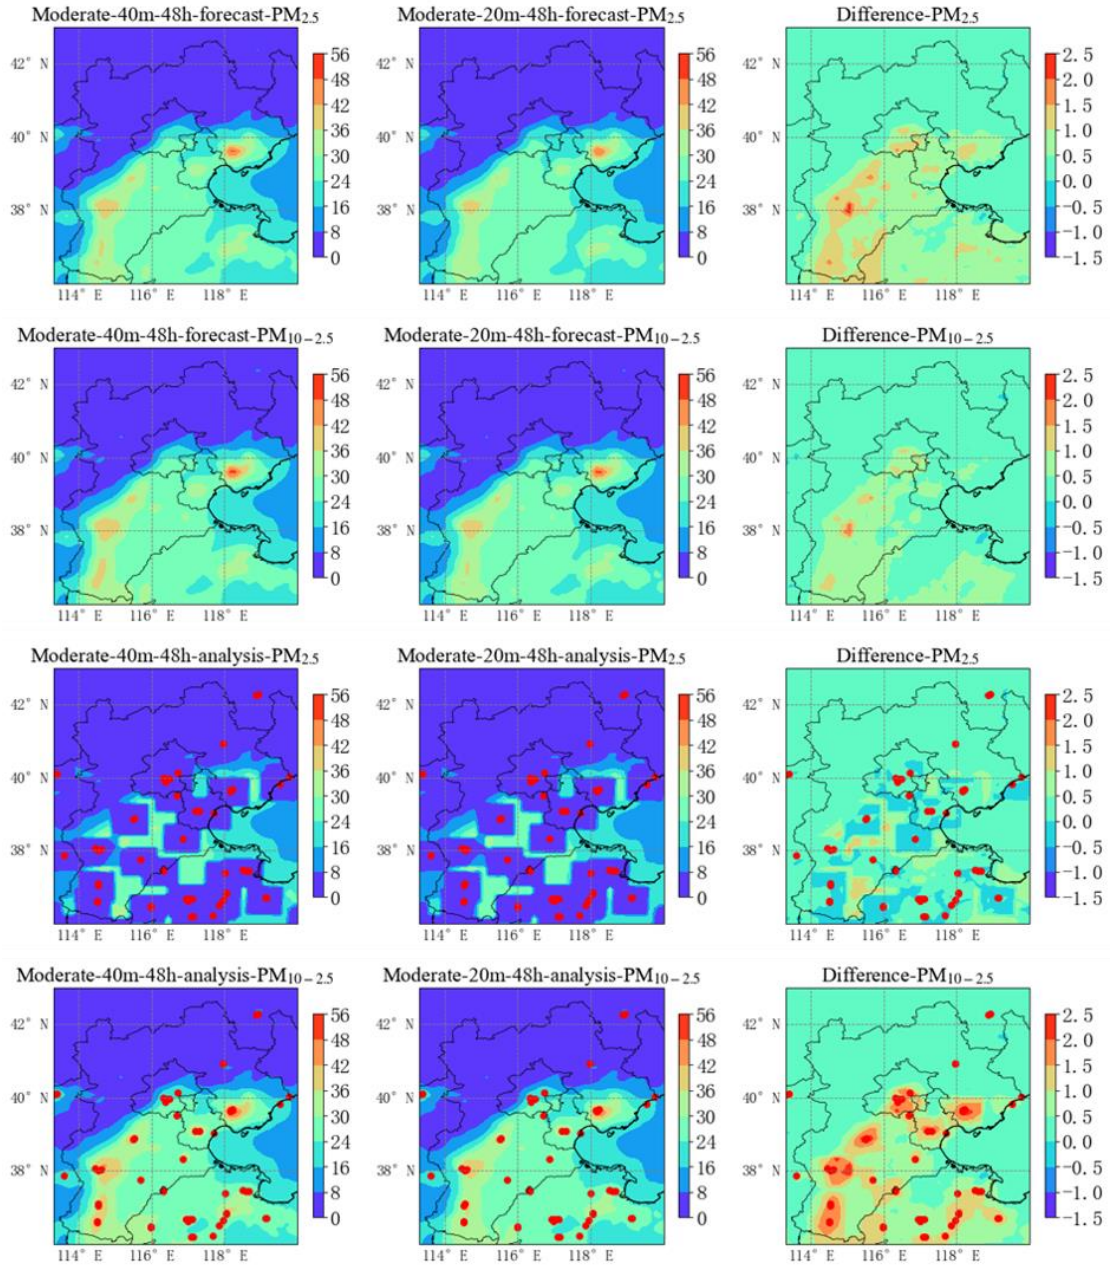

Figure S7. Contour maps of spatial distributions of temporal averaged PM<sub>2.5</sub> and PM<sub>10-2.5</sub> standard deviations in the first guess (first and second row) and analysis (third and fourth row) of Moderate-40m-48h, Moderate-20m-48h and their difference (Moderate-40m-48h minus Moderate-20m-48h) in a moderate haze event (units:  $\mu\text{g m}^{-3}$ ). The red dots in analysis of PM<sub>2.5</sub> and PM<sub>10-2.5</sub> implies the location of assimilated stations.
